# Supplementary material for: Mass Transfer and Intrinsic Light Variability in the Contact Binary MT Cas
Source: Hindawi journal article supplement (doi:10.1155/2019/4593092), 2019-04-04
Supplement: f1 [file 4593092.f1.zip]

Archive with 2 entries (2 files):
- datafile1.doc
- datafile1.txt
