# Supplementary material for: Mass Transfer and Intrinsic Light Variability in the Contact Binary MT Cas
Source: Hindawi journal article supplement (doi:10.1155/2019/4593092), 2019-04-04
Supplement: f1 [file 4593092.f1.zip › datafile1.doc]

Title: Mass Transfer and Intrinsic Light Variability in the Contact Binary MT Cas
Authors: Haifeng Dai, Huiyu Yuan & Yuangui Yang 
Table1: CCD Photometric Observations in V and Rc Bands
===========================================================
Byte-by-byte Description of file: datafile1.txt
-----------------------------------------------------------
   Bytes Format Units Label    Explanations
-----------------------------------------------------------
   1- 12 F12.4  d     HJD-V   V band Heliocentric Julian Date 
  14- 20 F6.3   mag   Vmag    differential V band magnitude
  22- 33 F12.4  d     HJD-Rc  Rc band Heliocentric Julian Date
  35- 40 F6.3   mag   Rcmag   differential Rc band magnitude
-----------------------------------------------------------
 2456629.9265 +0.066 2456629.9275 +0.269
 2456629.9285 +0.106 2456629.9294 +0.322
 2456629.9304 +0.133 2456629.9314 +0.349
 2456629.9323 +0.176 2456629.9333 +0.384
 2456629.9343 +0.225 2456629.9352 +0.413
 2456629.9362 +0.228 2456629.9372 +0.430
 2456629.9381 +0.238 2456629.9391 +0.441
 2456629.9401 +0.275 2456629.9429 +0.470
 2456629.9420 +0.318 2456629.9487 +0.493
 2456629.9439 +0.260 2456629.9526 +0.397
 2456629.9458 +0.287 2456629.9545 +0.390
 2456629.9478 +0.279 2456629.9564 +0.349
 2456629.9516 +0.211 2456629.9584 +0.288
 2456629.9536 +0.207 2456629.9603 +0.258
 2456629.9555 +0.171 2456629.9622 +0.218
 2456629.9574 +0.123 2456629.9642 +0.214
 2456629.9593 +0.077 2456629.9661 +0.167
 2456629.9632 +0.039 2456629.9680 +0.120
 2456629.9651 +0.009 2456629.9699 +0.115
 2456629.9671 -0.037 2456629.9714 +0.086
 2456629.9691 -0.067 2456629.9729 +0.073
 2456629.9706 -0.094 2456629.9743 +0.046
 2456629.9722 -0.121 2456629.9756 +0.043
 2456629.9736 -0.170 2456629.9770 +0.029
 2456629.9749 -0.165 2456629.9783 +0.024
 2456629.9763 -0.181 2456629.9797 +0.002
 2456629.9776 -0.184 2456629.9810 -0.013
 2456629.9790 -0.186 2456629.9824 -0.024
 2456629.9803 -0.195 2456629.9837 -0.028
 2456629.9817 -0.223 2456629.9851 -0.044
 2456629.9830 -0.212 2456629.9864 -0.035
 2456629.9844 -0.210 2456629.9878 -0.043
 2456629.9857 -0.256 2456629.9891 -0.069
 2456629.9871 -0.241 2456629.9905 -0.069
 2456629.9884 -0.258 2456629.9918 -0.070
 2456629.9898 -0.267 2456629.9932 -0.075
 2456629.9911 -0.284 2456629.9945 -0.089
 2456629.9925 -0.288 2456629.9959 -0.083
 2456629.9938 -0.284 2456629.9972 -0.090
 2456629.9952 -0.299 2456629.9986 -0.106
 2456629.9965 -0.310 2456629.9999 -0.100
 2456629.9979 -0.301 2456630.0013 -0.121
 2456629.9992 -0.314 2456630.0026 -0.096
 2456630.0006 -0.314 2456630.0040 -0.113
 2456630.0019 -0.327 2456630.0053 -0.121
 2456630.0033 -0.336 2456630.0067 -0.116
 2456630.0047 -0.333 2456630.0080 -0.133
 2456630.0060 -0.346 2456630.0094 -0.137
 2456630.0073 -0.353 2456630.0107 -0.133
 2456630.0087 -0.346 2456630.0121 -0.132
 2456630.0101 -0.352 2456630.0134 -0.144
 2456630.0114 -0.358 2456630.0148 -0.147
 2456630.0128 -0.355 2456630.0161 -0.151
 2456630.0141 -0.361 2456630.0175 -0.146
 2456630.0154 -0.343 2456630.0188 -0.138
 2456630.0168 -0.351 2456630.0202 -0.158
 2456630.0182 -0.367 2456630.0215 -0.129
 2456630.0209 -0.361 2456630.0229 -0.145
 2456630.0222 -0.351 2456630.0242 -0.151
 2456630.0236 -0.355 2456630.0256 -0.148
 2456630.0249 -0.354 2456630.0269 -0.141
 2456630.0263 -0.344 2456630.0283 -0.147
 2456630.0276 -0.362 2456630.0296 -0.136
 2456630.0290 -0.357 2456630.0310 -0.143
 2456630.0303 -0.336 2456630.0337 -0.124
 2456630.0317 -0.349 2456630.0350 -0.124
 2456630.0330 -0.339 2456630.0364 -0.131
 2456630.0357 -0.344 2456630.0377 -0.109
 2456630.0371 -0.339 2456630.0391 -0.115
 2456630.0384 -0.322 2456630.0404 -0.113
 2456630.0398 -0.333 2456630.0418 -0.109
 2456630.0411 -0.318 2456630.0431 -0.102
 2456630.0425 -0.320 2456630.0445 -0.100
 2456630.0438 -0.311 2456630.0458 -0.088
 2456630.0452 -0.300 2456631.9189 -0.123
 2456631.9182 -0.314 2456631.9207 -0.119
 2456631.9198 -0.322 2456631.9243 -0.098
 2456631.9216 -0.313 2456631.9261 -0.090
 2456631.9234 -0.300 2456631.9280 -0.085
 2456631.9252 -0.284 2456631.9298 -0.076
 2456631.9270 -0.295 2456631.9316 -0.062
 2456631.9289 -0.285 2456631.9334 -0.049
 2456631.9307 -0.280 2456631.9352 -0.042
 2456631.9325 -0.269 2456631.9370 -0.056
 2456631.9343 -0.255 2456631.9388 -0.043
 2456631.9361 -0.238 2456631.9406 -0.020
 2456631.9379 -0.241 2456631.9425 +0.004
 2456631.9397 -0.233 2456631.9443 -0.006
 2456631.9416 -0.235 2456631.9461 +0.021
 2456631.9434 -0.219 2456631.9479 +0.029
 2456631.9452 -0.195 2456631.9497 +0.077
 2456631.9470 -0.171 2456631.9515 +0.079
 2456631.9488 -0.182 2456631.9552 +0.114
 2456631.9506 -0.127 2456631.9570 +0.139
 2456631.9542 -0.113 2456631.9588 +0.167
 2456631.9561 -0.036 2456631.9606 +0.205
 2456631.9579 -0.047 2456631.9624 +0.235
 2456631.9597 -0.012 2456631.9642 +0.254
 2456631.9615 +0.019 2456631.9660 +0.300
 2456631.9633 +0.058 2456631.9678 +0.334
 2456631.9651 +0.102 2456631.9697 +0.376
 2456631.9669 +0.140 2456631.9715 +0.419
 2456631.9688 +0.191 2456631.9733 +0.444
 2456631.9706 +0.217 2456631.9751 +0.475
 2456631.9724 +0.247 2456631.9769 +0.517
 2456631.9742 +0.302 2456631.9787 +0.503
 2456631.9760 +0.307 2456631.9805 +0.512
 2456631.9796 +0.348 2456631.9823 +0.502
 2456631.9814 +0.358 2456631.9842 +0.507
 2456631.9833 +0.337 2456631.9860 +0.524
 2456631.9851 +0.338 2456631.9878 +0.515
 2456631.9869 +0.342 2456631.9896 +0.502
 2456631.9887 +0.359 2456631.9914 +0.506
 2456631.9905 +0.342 2456631.9932 +0.467
 2456631.9923 +0.318 2456631.9950 +0.438
 2456631.9941 +0.282 2456631.9969 +0.402
 2456631.9959 +0.246 2456631.9987 +0.374
 2456631.9978 +0.202 2456632.0005 +0.325
 2456631.9996 +0.172 2456632.0023 +0.290
 2456632.0014 +0.132 2456632.0041 +0.257
 2456632.0032 +0.107 2456632.0059 +0.266
 2456632.0050 +0.060 2456632.0077 +0.194
 2456632.0068 +0.033 2456632.0095 +0.176
 2456632.0108 -0.034 2456632.0115 +0.154
 2456632.0122 -0.065 2456632.0129 +0.128
 2456632.0135 -0.072 2456632.0142 +0.102
 2456632.0149 -0.092 2456632.0156 +0.092
 2456632.0162 -0.096 2456632.0169 +0.073
 2456632.0176 -0.123 2456632.0183 +0.045
 2456632.0189 -0.148 2456632.0196 +0.068
 2456632.0203 -0.161 2456632.0210 +0.042
 2456632.0216 -0.160 2456632.0223 +0.027
 2456632.0230 -0.179 2456632.0237 +0.023
 2456632.0243 -0.192 2456632.0250 +0.011
 2456632.0257 -0.180 2456632.0264 -0.005
 2456632.0270 -0.192 2456632.0291 -0.014
 2456632.0284 -0.181 2456632.0304 -0.043
 2456632.0297 -0.198 2456632.0318 -0.032
 2456632.0311 -0.220 2456632.0331 -0.046
 2456632.0324 -0.231 2456632.0345 -0.052
 2456632.0338 -0.248 2456632.0358 -0.058
 2456632.0351 -0.241 2456632.0372 -0.049
 2456632.0365 -0.242 2456632.0385 -0.049
 2456632.0378 -0.271 2456632.0399 -0.049
 2456632.0392 -0.246 2456632.0412 -0.060
 2456632.0405 -0.266 2456632.0426 -0.074
 2456632.0419 -0.266 2456632.0439 -0.075
 2456632.0433 -0.283 2456632.9188 +0.508
 2456632.0446 -0.290 2456632.9207 +0.527
 2456632.9178 +0.357 2456632.9226 +0.527
 2456632.9197 +0.344 2456632.9246 +0.526
 2456632.9217 +0.361 2456632.9265 +0.519
 2456632.9236 +0.342 2456632.9284 +0.524
 2456632.9255 +0.370 2456632.9301 +0.516
 2456632.9275 +0.364 2456632.9335 +0.495
 2456632.9292 +0.343 2456632.9352 +0.468
 2456632.9309 +0.355 2456632.9369 +0.451
 2456632.9326 +0.322 2456632.9386 +0.433
 2456632.9343 +0.327 2456632.9403 +0.377
 2456632.9360 +0.279 2456632.9419 +0.345
 2456632.9377 +0.249 2456632.9436 +0.311
 2456632.9394 +0.232 2456632.9453 +0.274
 2456632.9411 +0.174 2456632.9470 +0.262
 2456632.9428 +0.131 2456632.9487 +0.201
 2456632.9445 +0.100 2456632.9504 +0.192
 2456632.9462 +0.070 2456632.9521 +0.165
 2456632.9479 +0.047 2456632.9538 +0.152
 2456632.9496 +0.020 2456632.9555 +0.112
 2456632.9513 -0.019 2456632.9570 +0.077
 2456632.9530 -0.065 2456632.9584 +0.088
 2456632.9547 -0.044 2456632.9597 +0.071
 2456632.9564 -0.080 2456632.9611 +0.048
 2456632.9577 -0.119 2456632.9624 +0.030
 2456632.9591 -0.125 2456632.9638 +0.022
 2456632.9604 -0.142 2456632.9652 +0.029
 2456632.9618 -0.155 2456632.9665 +0.010
 2456632.9631 -0.149 2456632.9678 +0.008
 2456632.9645 -0.189 2456632.9692 +0.003
 2456632.9658 -0.188 2456632.9706 -0.009
 2456632.9672 -0.202 2456632.9719 -0.023
 2456632.9685 -0.181 2456632.9733 -0.024
 2456632.9699 -0.180 2456632.9746 -0.029
 2456632.9712 -0.195 2456632.9760 -0.034
 2456632.9726 -0.228 2456632.9773 -0.044
 2456632.9739 -0.234 2456632.9787 -0.048
 2456632.9753 -0.241 2456632.9800 -0.059
 2456632.9766 -0.235 2456632.9814 -0.057
 2456632.9780 -0.238 2456632.9827 -0.069
 2456632.9793 -0.263 2456632.9841 -0.069
 2456632.9807 -0.267 2456632.9854 -0.063
 2456632.9820 -0.270 2456632.9868 -0.081
 2456632.9834 -0.261 2456632.9881 -0.076
 2456632.9847 -0.273 2456632.9895 -0.076
 2456632.9861 -0.280 2456632.9962 -0.091
 2456632.9874 -0.273 2456632.9976 -0.113
 2456632.9901 -0.289 2456632.9989 -0.099
 2456632.9915 -0.300 2456633.0003 -0.116
 2456632.9928 -0.292 2456633.0016 -0.111
 2456632.9942 -0.301 2456633.0030 -0.107
 2456632.9955 -0.309 2456633.0043 -0.109
 2456632.9969 -0.311 2456633.0057 -0.103
 2456632.9996 -0.319 2456633.0124 -0.108
 2456633.0009 -0.324 2456633.0138 -0.119
 2456633.0023 -0.323 2456633.0151 -0.095
 2456633.0037 -0.320 2456633.0165 -0.116
 2456633.0050 -0.332 2456633.0178 -0.102
 2456633.0064 -0.312 2456633.0192 -0.092
 2456633.0077 -0.325 2456633.0219 -0.088
 2456633.0091 -0.328 2456633.0232 -0.082
 2456633.0104 -0.329 2456633.0246 -0.088
 2456633.0118 -0.314 2456633.0259 -0.077
 2456633.0131 -0.330 2456633.0273 -0.080
 2456633.0145 -0.308 2456633.0286 -0.064
 2456633.0158 -0.319 2456633.0300 -0.062
 2456633.0172 -0.312 2456633.0327 -0.057
 2456633.0185 -0.309 2456633.0341 -0.051
 2456633.0199 -0.293 2456633.0354 -0.033
 2456633.0212 -0.294 2456633.0368 -0.021
 2456633.0226 -0.299 2456633.0381 -0.037
 2456633.0239 -0.298 2456633.0395 -0.018
 2456633.0253 -0.279 2456633.0408 -0.022
 2456633.0266 -0.282 2456633.0422 -0.009
 2456633.0280 -0.273 2456633.0435 +0.005
 2456633.0293 -0.271 2456633.0449 +0.004
 2456633.0320 -0.253 2456633.9318 -0.096
 2456633.0334 -0.253 2456633.9337 -0.082
 2456633.0347 -0.235 2456633.9355 -0.095
 2456633.0361 -0.248 2456633.9373 -0.093
 2456633.0374 -0.226 2456633.9409 -0.089
 2456633.0388 -0.245 2456633.9427 -0.108
 2456633.0401 -0.229 2456633.9445 -0.083
 2456633.0415 -0.204 2456633.9464 -0.107
 2456633.0428 -0.213 2456633.9482 -0.093
 2456633.0442 -0.188 2456633.9500 -0.097
 2456633.9309 -0.280 2456633.9518 -0.115
 2456633.9327 -0.313 2456633.9554 -0.109
 2456633.9346 -0.295 2456633.9572 -0.102
 2456633.9364 -0.291 2456633.9590 -0.091
 2456633.9382 -0.315 2456633.9609 -0.083
 2456633.9400 -0.302 2456633.9645 -0.072
 2456633.9418 -0.299 2456633.9663 -0.069
 2456633.9436 -0.316 2456633.9681 -0.050
 2456633.9454 -0.301 2456633.9699 -0.047
 2456633.9473 -0.319 2456633.9717 -0.050
 2456633.9491 -0.312 2456633.9735 -0.048
 2456633.9509 -0.320 2456633.9754 -0.025
 2456633.9527 -0.299 2456633.9772 -0.043
 2456633.9545 -0.327 2456633.9790 -0.018
 2456633.9563 -0.310 2456633.9808 -0.023
 2456633.9581 -0.307 2456633.9826 -0.008
 2456633.9600 -0.301 2456633.9844 +0.016
 2456633.9618 -0.287 2456633.9862 +0.004
 2456633.9636 -0.289 2456633.9881 +0.033
 2456633.9654 -0.287 2456633.9899 +0.041
 2456633.9672 -0.271 2456633.9917 +0.073
 2456633.9726 -0.257 2456633.9935 +0.072
 2456633.9745 -0.254 2456633.9953 +0.103
 2456633.9763 -0.241 2456633.9971 +0.122
 2456633.9781 -0.221 2456633.9989 +0.161
 2456633.9799 -0.214 2456634.0008 +0.172
 2456633.9817 -0.195 2456634.0026 +0.236
 2456633.9853 -0.177 2456634.0044 +0.291
 2456633.9871 -0.170 2456634.0062 +0.266
 2456633.9890 -0.145 2456634.0080 +0.315
 2456633.9908 -0.131 2456634.0098 +0.330
 2456633.9926 -0.135 2456634.0116 +0.360
 2456633.9944 -0.113 2456634.0134 +0.384
 2456633.9962 -0.093 2456634.0153 +0.430
 2456633.9980 -0.078 2456634.0171 +0.426
 2456633.9998 -0.052 2456634.0189 +0.457
 2456634.0017 -0.015 2456634.0207 +0.480
 2456634.0035 +0.017 2456634.0225 +0.488
 2456634.0071 +0.065 2456634.0243 +0.471
 2456634.0089 +0.107 2456634.0261 +0.504
 2456634.0107 +0.170 2456634.0280 +0.483
 2456634.0125 +0.202 2456634.0298 +0.448
 2456634.0144 +0.229 2456634.0316 +0.433
 2456634.0162 +0.221 2456634.0334 +0.399
 2456634.0180 +0.288 2456634.0352 +0.414
 2456634.0198 +0.269 2456634.0370 +0.334
 2456634.0216 +0.273 2456634.0388 +0.318
 2456634.0234 +0.314 2456634.0406 +0.329
 2456634.0252 +0.319 2456634.0425 +0.256
 2456634.0270 +0.298 2456634.9686 +0.494
 2456634.0289 +0.313 2456634.9704 +0.487
 2456634.0307 +0.270 2456634.9722 +0.470
 2456634.0325 +0.247 2456634.9740 +0.430
 2456634.0343 +0.229 2456634.9758 +0.410
 2456634.0361 +0.200 2456634.9776 +0.373
 2456634.0397 +0.106 2456634.9794 +0.344
 2456634.9676 +0.290 2456634.9812 +0.309
 2456634.9695 +0.278 2456634.9831 +0.289
 2456634.9713 +0.243 2456634.9849 +0.222
 2456634.9731 +0.233 2456634.9867 +0.201
 2456634.9749 +0.244 2456634.9885 +0.162
 2456634.9767 +0.196 2456634.9903 +0.147
 2456634.9785 +0.141 2456634.9921 +0.113
 2456634.9803 +0.148 2456634.9939 +0.106
 2456634.9821 +0.100 2456634.9957 +0.093
 2456634.9840 +0.060 2456634.9976 +0.059
 2456634.9858 +0.004 2456634.9994 +0.052
 2456634.9876 -0.020 2456635.0012 +0.016
 2456634.9894 -0.052 2456635.0030 +0.023
 2456634.9912 -0.049 2456635.0048 -0.008
 2456634.9930 -0.089 2456635.0066 -0.004
 2456634.9948 -0.115 2456635.0084 -0.023
 2456634.9967 -0.124 2456635.0103 -0.039
 2456634.9985 -0.153 2456635.0121 -0.042
 2456635.0003 -0.171 2456635.0139 -0.057
 2456635.0021 -0.181 2456635.0157 -0.056
 2456635.0039 -0.196 2456635.0175 -0.076
 2456635.0057 -0.232 2456635.0193 -0.077
 2456635.0075 -0.223 2456635.0211 -0.087
 2456635.0093 -0.254 2456635.0229 -0.099
 2456635.0112 -0.249 2456635.0248 -0.095
 2456635.0148 -0.265 2456635.0266 -0.108
 2456635.0166 -0.282 2456635.9258 +0.249
 2456635.0184 -0.298 2456635.9276 +0.184
 2456635.0202 -0.297 2456635.9294 +0.196
 2456635.0220 -0.281 2456635.9312 +0.144
 2456635.0239 -0.298 2456635.9330 +0.125
 2456635.0257 -0.315 2456635.9349 +0.107
 2456635.9249 +0.068 2456635.9367 +0.083
 2456635.9267 +0.019 2456635.9385 +0.069
 2456635.9285 +0.005 2456635.9403 +0.034
 2456635.9303 -0.048 2456635.9421 +0.023
 2456635.9321 -0.055 2456635.9439 +0.004
 2456635.9339 -0.089 2456635.9457 -0.006
 2456635.9358 -0.111 2456635.9475 -0.006
 2456635.9376 -0.130 2456635.9494 -0.032
 2456635.9394 -0.146 2456635.9512 -0.041
 2456635.9412 -0.173 2456635.9530 -0.049
 2456635.9430 -0.175 2456635.9548 -0.052
 2456635.9448 -0.204 2456635.9621 -0.086
 2456635.9466 -0.224 2456635.9639 -0.091
 2456635.9485 -0.228 2456635.9657 -0.098
 2456635.9503 -0.226 2456635.9675 -0.122
 2456635.9521 -0.269 2456635.9693 -0.120
 2456635.9539 -0.253 2456635.9711 -0.122
 2456635.9557 -0.271 2456635.9729 -0.133
 2456635.9575 -0.273 2456635.9766 -0.133
 2456635.9593 -0.282 2456635.9784 -0.155
 2456635.9630 -0.307 2456635.9820 -0.150
 2456635.9648 -0.299 2456635.9838 -0.144
 2456635.9666 -0.316 2456635.9874 -0.144
 2456635.9684 -0.319 2456635.9893 -0.133
 2456635.9720 -0.333 2456635.9929 -0.133
 2456635.9738 -0.341 2456635.9947 -0.127
 2456635.9757 -0.347 2456635.9965 -0.125
 2456635.9793 -0.346 2456635.9983 -0.110
 2456635.9811 -0.351 2456636.0020 -0.113
 2456635.9847 -0.343 2456636.0038 -0.098
 2456635.9865 -0.347 2456636.0074 -0.096
 2456635.9902 -0.343 2456636.0092 -0.074
 2456635.9920 -0.343 2456636.0110 -0.084
 2456635.9938 -0.331 2456636.0128 -0.050
 2456635.9956 -0.322 2456636.0146 -0.053
 2456635.9974 -0.322 2456636.0165 -0.058
 2456635.9992 -0.324 2456636.0183 -0.030
 2456636.0010 -0.312 2456636.0201 -0.019
 2456636.0029 -0.308 2456636.0219 -0.017
 2456636.0047 -0.290 2456636.0237 +0.012
 2456636.0065 -0.298 2456636.0255 +0.015
 2456636.0083 -0.281 2456636.0273 +0.043
 2456636.0101 -0.278 2456636.0291 +0.027
 2456636.0119 -0.253 2456636.0310 +0.070
 2456636.0137 -0.271 2456636.0328 +0.072
 2456636.0155 -0.240 2456636.0346 +0.103
 2456636.0174 -0.224 2456636.0364 +0.110
 2456636.0192 -0.244 2456636.0382 +0.150
 2456636.0210 -0.215 2456636.0400 +0.186
 2456636.0228 -0.197 2456636.0418 +0.221
 2456636.0246 -0.181 2456636.0437 +0.261
 2456636.0264 -0.195      +0.0000 +0.000
 2456636.0282 -0.141      +0.0000 +0.000
 2456636.0301 -0.136      +0.0000 +0.000
 2456636.0319 -0.137      +0.0000 +0.000
 2456636.0337 -0.108      +0.0000 +0.000
 2456636.0355 -0.077      +0.0000 +0.000
 2456636.0373 -0.041      +0.0000 +0.000
 2456636.0391 -0.041      +0.0000 +0.000
 2456636.0409 +0.007      +0.0000 +0.000
 2456636.0427 +0.065      +0.0000 +0.000
